# Supplementary material for: DNA concatamers-based biosensor for Pb(ii) using electrochemical impedance spectroscopy
Source: Royal Society of Chemistry journal article supplement (doi:10.1039/c4ay01230e), 2014-09-29
Supplement: c4ay01230e1.pdf [file c4ay01230e1.pdf]

1 temperature. A three-electrode electrochemical cell was used. Gold electrode (2 mm  
2 in diameter, CH Instruments, Shanghai, China) was used as the working electrode.  
3 Platinum wire and Ag/AgCl (saturated with KCl) were used as counter electrode and  
4 reference electrode, respectively.

5 **Preparation of DNA sensor.** Gold electrodes (the diameter of 3mm) were  
6 polished with aqueous slurries of 1.0, 0.3, 0.05  $\mu\text{m}$   $\alpha\text{-Al}_2\text{O}_3$  powders on the polishing  
7 microcloth, respectively, to obtain a mirror-like surface. After rinsed with water, the  
8 electrodes were electrochemically cleaned in 0.5 M sulfuric acid by consecutive  
9 cyclic voltammetry in the potential range of 0~1.6V until a stable curve was achieved.  
10 The cleaned gold surfaces were immersed in the immobilization buffer containing  
11 0.05  $\mu\text{mol/L}$  DNAzyme for 90 min, and then were treated with 1.0 mmol/L MCH for  
12 30 min, which is able to minimize nonspecific binding, maximize the efficiency of  
13 hybridization of capture and target probes, and reach a well-aligned DNAzyme  
14 monolayer. Next, this DNAzyme monolayer-functionalized electrodes were immersed  
15 into substrate strand solution for 2 h at room temperature to achieve DNA-substrate  
16 electrodes. It is noting that the electrodes should be washed with distilled water to  
17 eliminate the physical adsorption after each modification step.

18 **Cleavage of  $\text{Pb}^{2+}$  and HCR reaction.** For cleavage of  $\text{Pb}^{2+}$ , above mentioned  
19 DNA-substrate electrodes were immersed into buffer solutions containing different  
20 concentrations of  $\text{Pb}^{2+}$  fully for 1 h at room temperature, and then rinsed using  
21 distilled water carefully. After cleavage, the electrodes were incubated into 20  $\mu\text{L}$  of a  
22 freshly prepared auxiliary probe solution containing 1  $\mu\text{M}$  A1 and 1  $\mu\text{M}$  A2 for 120

1 min to perform DNA self-assembly.

2

3 **Electrochemical detection.** In the electrochemical assay, three-electrode system  
4 was used, that is, above DNA-modified electrode was used as the working electrode,  
5 platinum wire and Ag/AgCl (saturated with KCl) were used as counter and reference  
6 electrodes, respectively. Electrodes were immersed were performed in the solution  
7 containing 5 mmol/L  $[\text{Fe}(\text{CN})_6]^{3-/4-}$  for EIS experiments. The biased potential was  
8 0.214 V (vs. Ag/AgCl) and the amplitude was 5.0 mV, and the electrochemical  
9 impedance spectra were recorded in the frequency range of 10 kHz to 1 Hz. To  
10 calculate the DNA surface coverage on the gold electrode, 5.0  $\mu\text{M}$   $[\text{Ru}(\text{NH}_3)_6]^{3+}$  as a  
11 cationic indicator was used. At first, the surface concentration ( $\Gamma_{\text{Ru}}$ ) of  $[\text{Ru}(\text{NH}_3)_6]^{3+}$   
12 on the gold electrode was calculated by the formula as follow<sup>1, 2</sup>:

13 
$$\Gamma_{\text{Ru}} = Q/nFA$$

14 where  $Q$  is the charge obtained by integrating the reduction peak area of surface-  
15 bound  $[\text{Ru}(\text{NH}_3)_6]^{3+}$ ,  $n$  is the number of electrons involved in the redox reaction,  $F$  is  
16 Faraday's constant, and  $A$  is the electrode area. And then the DNA surface coverage  
17 ( $\Gamma_{\text{DNA}}$ ) on the gold electrode was achieved using the following equation:

18 
$$\Gamma_{\text{DNA}} = \Gamma_{\text{Ru}}(z/m)N_A$$

19 where  $z$  is the valence of the redox cation (+3) and  $m$  is the number of nucleotides in  
20 the DNA.

21 **The preparation of *Bauhinia championi* extraction.** 5.0 g of *Bauhinia*  
22 *championi* was extracted in 20 mL of concentrated HCl via soxhlet extraction for 1 h.

1 After filtration to remove insoluble substance, 1 mL of extraction was diluted to 1000  
2 mL with Tris-HCl (pH 7.4) consisting of 0.5 mol/L NaCl.

### 3 Results and Discussion

4 In order to obtain better assay results, the concentrations and the self-assembled  
5 time of A1 and A2 are investigated. Figure S1A indicates that  $R_{ct}$  changes upon  
6 different concentrations of A1 and A2. With the enhancement of A1 and A2  
7 concentrations,  $R_{ct}$  increases gradually. However, the signal reaches maximum when  
8 the concentrations of A1 and A2 are up to 1.0  $\mu\text{M}$ . Thus, 1.0  $\mu\text{M}$  of A1 and A2 are  
9 chosen. At 1.0  $\mu\text{M}$  of A1 and A2, and then the self-assembled time is examined. From  
10 Fig. S2B, it is found that when the self-assembly time extends to 120 min,  $R_{ct}$   
11 increases slightly, even approaches the plateau. Therefore, the self-assembled time is  
12 set as 120 min.

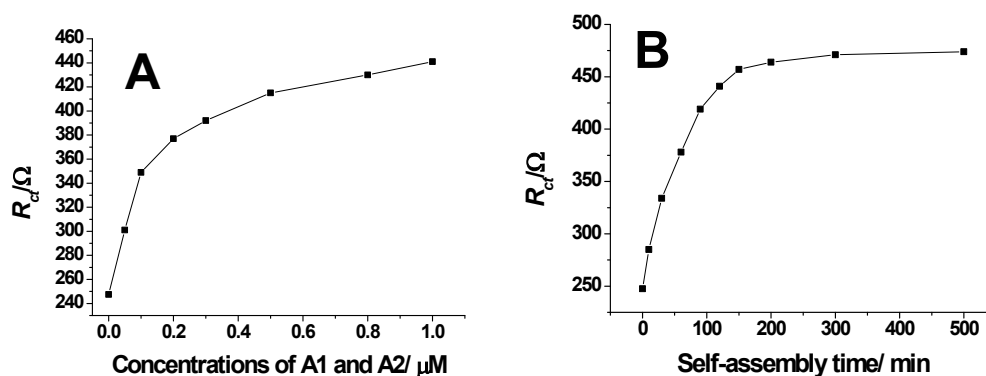

13

14 **Figure S1** (A) Effect of the concentrations of A1 and A2 to  $R_{ct}$  value. (B)

15 Optimization of self-assembly time in the 1.0  $\mu\text{M}$  of A1 and A2.

16 Here, this sensor has been used to assay  $\text{Pb}^{2+}$  in the river samples. The river

17 samples from Minjiang River were let stand overnight, and filtered by a filter

1 membrane (0.2  $\mu\text{m}$ ) to remove insoluble substance. By the detection, there is no  $\text{Pb}^{2+}$   
2 detected. The reason may be that the content of  $\text{Pb}^{2+}$  in the river is lower than the  
3 lowest detectable concentration of this sensor. And then we spiked known amounts of  
4  $\text{Pb}^{2+}$  into the river sample, shown in Table 1. It is found that there are satisfactory  
5 recoveries (93.6~103%) achieved.

6

7

8

9

**Table 1** Assay of  $\text{Pb}^{2+}$  in river samples

| Sample number | Added (nM) | Found (nM) | Recover (%) |
|---------------|------------|------------|-------------|
| 1             | 1.0        | 1.03       | 103         |
|               | 2.0        | 1.95       | 97.5        |
|               | 5.0        | 4.86       | 97.2        |
| 2             | 1.0        | 0.94       | 94          |
|               | 2.0        | 2.04       | 102         |
|               | 5.0        | 4.68       | 93.6        |

10

## 11 Reference

<sup>1</sup> H.-Z. Yu, C.-Y. Luo, C. G. Sankar and D. Sen, *Anal. Chem.*, 2003, **75**, 3902–3907

<sup>2</sup> A. K. H. Cheng, B. Ge and H.-Z. Yu, *Anal. Chem.*, 2007, **79**, 5158–5164
